# Supplementary material
Source: PubMed Central journal article supplement (PMC9633421)

**Supplementary Figure S2. Spearman correlation heatmap for selected metabolites in the Training Set.**

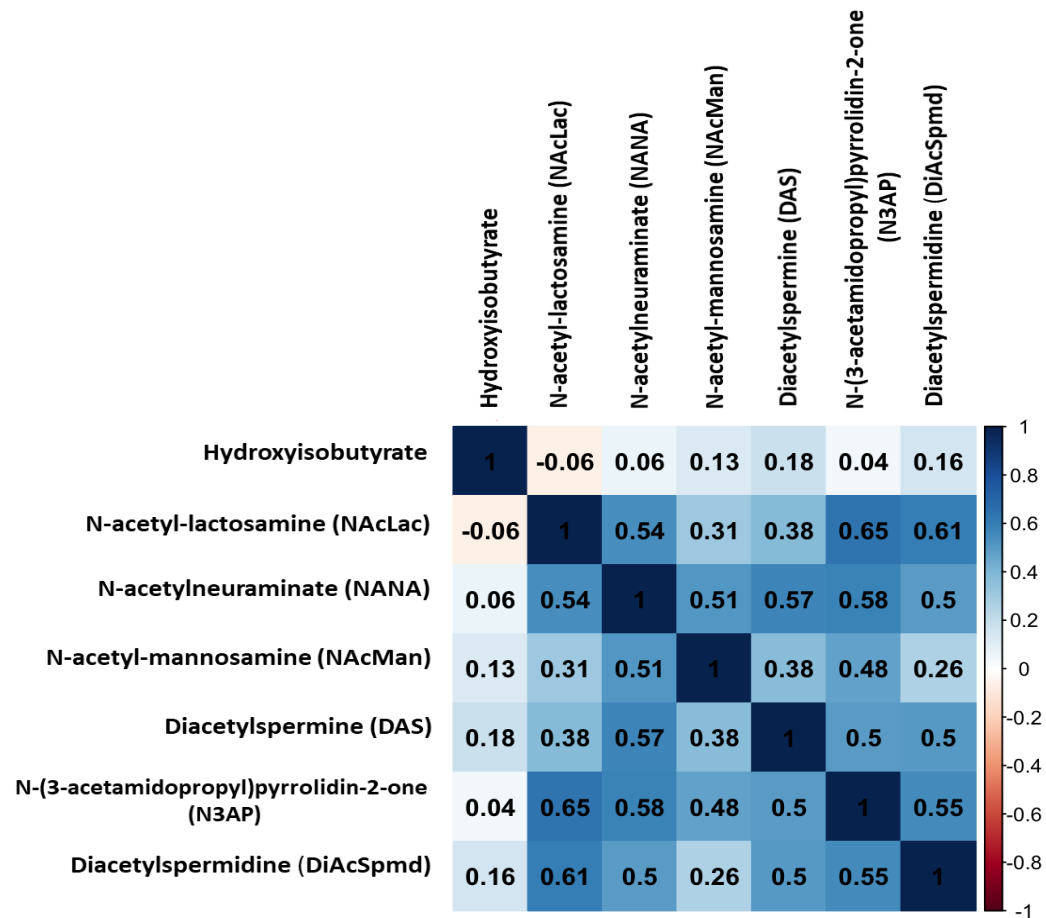

Supplement: NIHMS1834140-supplement-2.pdf [file NIHMS1834140-supplement-2.pdf]
