# Supplementary material
Source: PubMed Central journal article supplement (PMC9633421)
Supplement: NIHMS1834140-supplement-3.pdf [file NIHMS1834140-supplement-3.pdf]

## Contents

|                                                                                                                                                                                                                                                |    |
|------------------------------------------------------------------------------------------------------------------------------------------------------------------------------------------------------------------------------------------------|----|
| <b>Supplementary Table S1.</b> Characteristics of Ovarian Cancers and Benign Pelvic Masses.....                                                                                                                                                | 2  |
| <b>Supplementary Table S2.</b> Estimated coefficients for the combined model of the 7MetP plus ROMA.....                                                                                                                                       | 3  |
| <b>Supplementary Table S3.</b> Predictive performance of quantified metabolites for distinguishing OvCa from BPM in the Training Set.....                                                                                                      | 4  |
| <b>Supplementary Table S4.</b> Individual predictive performance of selected metabolites in the Training Set.....                                                                                                                              | 5  |
| <b>Supplementary Table S5.</b> Performance of the 7-marker metabolite panel (7MetP) for distinguishing OvCa cases from individuals with BPM in the Training Set, the independent Test Set, and the combined Training+Testing Specimen Set..... | 6  |
| <b>Supplementary Table S6.</b> Stability check of the deep learning model (DLM) in the Training Set.....                                                                                                                                       | 7  |
| <b>Supplementary Table S7.</b> Predictive performance of the 7MetP for distinguishing OvCa cases stratified into serous and non-serous from BPM in the Training Set.....                                                                       | 8  |
| <b>Supplementary Table S8.</b> Performance estimates of ROMA and the combined 7MetP+ROMA model for all OvCa in the combined specimen set.....                                                                                                  | 9  |
| <b>Supplementary Figure S1.</b> Schematic of workflow.....                                                                                                                                                                                     | 10 |
| <b>Supplementary Figure S2.</b> Spearman correlation heatmap for selected metabolites in the Training Set.....                                                                                                                                 | 11 |
| <b>References</b> .....                                                                                                                                                                                                                        | 12 |

**Supplementary Table S1. Characteristics of Ovarian Cancers and Benign Pelvic Masses.**

*See excel*

**Supplementary Table S2. Estimated coefficients for the combined model of the 7MetP plus ROMA.**

|                     | <b>Intercept</b> | <b>ROMA</b> | <b>7MetP</b> |
|---------------------|------------------|-------------|--------------|
| <b>Coefficients</b> | -3.15            | 4.06        | 4.12         |

**Supplementary Table S3. Predictive performance of quantified metabolites for distinguishing OvCa from BPM in the Training Set.**

***See excel***

**Supplementary Table S4. Individual predictive performance of selected metabolites in the Training Set.**

| <b>Features</b>                                     | <b>AUC (95% CI)</b> | <b>Sensitivity (95% CI)<br/>@ 99% specificity</b> | <b>Specificity (95% CI)<br/>@ 99% sensitivity</b> |
|-----------------------------------------------------|---------------------|---------------------------------------------------|---------------------------------------------------|
| <b>Diacetylspermine (DAS)</b>                       | 0.82 (0.76 - 0.88)  | 0.28 (0.05 - 0.50)                                | 0.07 (0.03 - 0.34)                                |
| <b>N-acetylneuraminate (NANA)</b>                   | 0.65 (0.58 - 0.73)  | 0.03 (0.00 - 0.08)                                | 0.05 (0.01 - 0.15)                                |
| <b>N-acetyl-mannosamine (NAcMan)</b>                | 0.58 (0.50 - 0.65)  | 0.05 (0.01 - 0.12)                                | 0.04 (0.00 - 0.17)                                |
| <b>N-acetyl-lactosamine (NAcLac)</b>                | 0.55 (0.48 - 0.63)  | 0.03 (0.00 - 0.07)                                | 0.04 (0.01 - 0.08)                                |
| <b>Diacetylspermidine (DiAcSpmd)</b>                | 0.67 (0.60 - 0.74)  | 0.03 (0.00 - 0.18)                                | 0.05 (0.01 - 0.10)                                |
| <b>N-(3-acetamidopropyl)pyrrolidin-2-one (N3AP)</b> | 0.56 (0.49 - 0.64)  | 0.05 (0.00 - 0.13)                                | 0.03 (0.00 - 0.08)                                |
| <b>Hydroxyisobutyrate (HBA)</b>                     | 0.71 (0.64 - 0.77)  | 0.08 (0.03 - 0.20)                                | 0.16 (0.00 - 0.25)                                |

**Supplementary Table S5. Performance of the 7-marker metabolite panel (7MetP) for distinguishing OvCa cases from individuals with BPM in the Training Set, the independent Test Set, and the combined Training+Testing Specimen Set.**

|                                           | Training Set       |                    | Testing Set        |                    | Combined Dataset   |                    |
|-------------------------------------------|--------------------|--------------------|--------------------|--------------------|--------------------|--------------------|
|                                           | Early-Stage (n=39) | All Stage (n=101)  | Early-Stage (n=20) | All Stage (n=118)  | Early-Stage (n=59) | All Stage (n=219)  |
| <b>AUC</b>                                | 0.75 (0.66 - 0.85) | 0.83 (0.78 - 0.89) | 0.86 (0.76 - 0.95) | 0.88 (0.82 - 0.93) | 0.81 (0.76 - 0.86) | 0.85 (0.81 - 0.88) |
| <b>Sensitivity at 99%<br/>specificity</b> | 0.21 (0.08 - 0.40) | 0.41 (0.17 - 0.50) | 0.15 (0.00 - 0.35) | 0.40 (0.31 - 0.62) | 0.20 (0.11 - 0.28) | 0.39 (0.20 - 0.47) |
| <b>Sensitivity at 95%<br/>specificity</b> | 0.24 (0.11 - 0.47) | 0.47 (0.35 - 0.66) | 0.30 (0.05 - 0.65) | 0.51 (0.33 - 0.75) | 0.25 (0.15 - 0.44) | 0.46 (0.38 - 0.62) |
| <b>Specificity at 99%<br/>sensitivity</b> | 0.54 (0.40 - 0.78) | 0.16 (0.06 - 0.30) | 0.36 (0.24 - 0.80) | 0.11 (0.02 - 0.42) | 0.13 (0.08 - 0.35) | 0.12 (0.05 - 0.28) |
| <b>Specificity at 95%<br/>sensitivity</b> | 0.10 (0.05 - 0.28) | 0.29 (0.14 - 0.47) | 0.55 (0.27 - 0.87) | 0.40 (0.07 - 0.62) | 0.32 (0.19 - 0.50) | 0.31 (0.20 - 0.44) |

**Supplementary Table S6. Stability check of the deep learning model (DLM) in the Training Set**

|                                           | <b>Scenario #1</b>                    | <b>Scenario #2</b>                      | <b>Scenario #3</b>                 | <b>Scenario #4</b>                 | <b>Scenario #5</b>                       |
|-------------------------------------------|---------------------------------------|-----------------------------------------|------------------------------------|------------------------------------|------------------------------------------|
|                                           | <b>Early-stage<br/>OvCa cases and</b> | <b>All stage OvCa<br/>cases and BPM</b> | <b>500 random<br/>samples with</b> | <b>173 random<br/>samples with</b> | <b>Late-stage OvCa<br/>cases and BPM</b> |
| <b>N0 (# of BPM)</b>                      | 134                                   | 134                                     | 406                                | 143                                | 134                                      |
| <b>N1 (# of cases)</b>                    | 39                                    | 100                                     | 94                                 | 30                                 | 61                                       |
| <b>AUC</b>                                | 0.75 (0.66 - 0.85)                    | 0.83 (0.78 - 0.89)                      | 0.76 (0.70 - 0.82)                 | 0.76 (0.68 - 0.84)                 | 0.88 (0.83 - 0.94)                       |
| <b>Sensitivity at<br/>95% specificity</b> | 0.26 (0.11 - 0.47)                    | 0.46 (0.36 - 0.64)                      | 0.35 (0.17 - 0.56)                 | 0.20 (0.10 - 0.45)                 | 0.61 (0.47 - 0.78)                       |
| <b>Specificity at<br/>95% sensitivity</b> | 0.16 (0.05 - 0.47)                    | 0.29 (0.16 - 0.49)                      | 0.18 (0.12 - 0.28)                 | 0.34 (0.14 - 0.50)                 | 0.33 (0.22 - 0.68)                       |

**Supplementary Table S7. Predictive performance of the 7MetP for distinguishing OvCa cases stratified into serous and non-serous from BPM in the Training Set.**

|                                       | Serous carcinoma   |                    | Non-serous carcinoma |                    |
|---------------------------------------|--------------------|--------------------|----------------------|--------------------|
|                                       | Early-Stage (n=13) | All Stage (n=69)   | Early-Stage (n=25)   | All Stage (n=31)   |
| <b>AUC</b>                            | 0.69 (0.52 - 0.86) | 0.85 (0.79 - 0.91) | 0.79 (0.68 - 0.89)   | 0.80 (0.71 - 0.89) |
| <b>Sensitivity at 99% specificity</b> | 0.23 (0.00 - 0.46) | 0.48 (0.17 - 0.61) | 0.20 (0.04 - 0.36)   | 0.23 (0.10 - 0.39) |
| <b>Sensitivity at 95% specificity</b> | 0.23 (0.00 - 0.54) | 0.55 (0.39 - 0.71) | 0.24 (0.08 - 0.44)   | 0.29 (0.13 - 0.55) |
| <b>Specificity at 99% sensitivity</b> | 0.10 (0.05 - 0.48) | 0.11 (0.05 - 0.28) | 0.19 (0.11 - 0.44)   | 0.19 (0.11 - 0.40) |
| <b>Specificity at 95% sensitivity</b> | 0.11 (0.06 - 0.51) | 0.26 (0.14 - 0.51) | 0.33 (0.13 - 0.59)   | 0.30 (0.12 - 0.52) |



**Supplementary Table S8. Performance estimates of ROMA and the combined 7MetP+ROMA model for all OvCa in the combined specimen set.**

| All OvCa (n=219) vs BPM (N=190)                                                                   |                     |                    |                    |                       |                  |
|---------------------------------------------------------------------------------------------------|---------------------|--------------------|--------------------|-----------------------|------------------|
|                                                                                                   |                     | ROMA               | ROMA + 7MetP       | Difference            | <i>P</i>         |
|                                                                                                   | <b>AUC (95% CI)</b> | 0.94 (0.92 - 0.95) | 0.94 (0.93 - 0.96) | 0.01 (0.00 to 0.01)   | .001             |
| <b>At 11.4% risk threshold for premenopausal and 29.9% for postmenopausal (same risk as ROMA)</b> | <b>Sensitivity</b>  | 0.92 (0.89 - 0.94) | 0.90 (0.87 - 0.92) | -0.02 (-0.04 to 0.00) | .01              |
|                                                                                                   | <b>Specificity</b>  | 0.78 (0.75 - 0.82) | 0.89 (0.86 - 0.91) | 0.11 (0.08 to 0.14)   | <b>&lt; .001</b> |
|                                                                                                   | <b>PPV</b>          | 0.83 (0.80 - 0.86) | 0.90 (0.88 - 0.92) | 0.07 (0.05 to 0.10)   | <b>&lt; .001</b> |
|                                                                                                   | <b>NPV</b>          | 0.89 (0.86 - 0.92) | 0.88 (0.86 - 0.91) | -0.01 (-0.03 to 0.01) | .21              |

**Abbreviations:** PPV: positive predictive value; NPV: negative predictive value. P-values for comparison of AUCs represent likelihood ratio tests. Risk threshold corresponding to 11.4% in premenopausal women and 29.9% for postmenopausal were chosen based on reported findings from Ortiz-Munoz and colleagues.<sup>11</sup> 1-sided P-values are reported as we expect that the combined 7MetP+ROMA will yield improved performance estimates compared to ROMA alone.

## References

1. Ortiz-Muñoz B, Aznar-Oroval E, García AG, et al: HE4, Ca125 and ROMA algorithm for differential diagnosis between benign gynaecological diseases and ovarian cancer. *Tumor Biology* 35:7249-7258, 2014
