# Supplementary material
Source: PubMed Central journal article supplement (PMC9633421)

Supplementary Figure S1. Schematic of workflow.

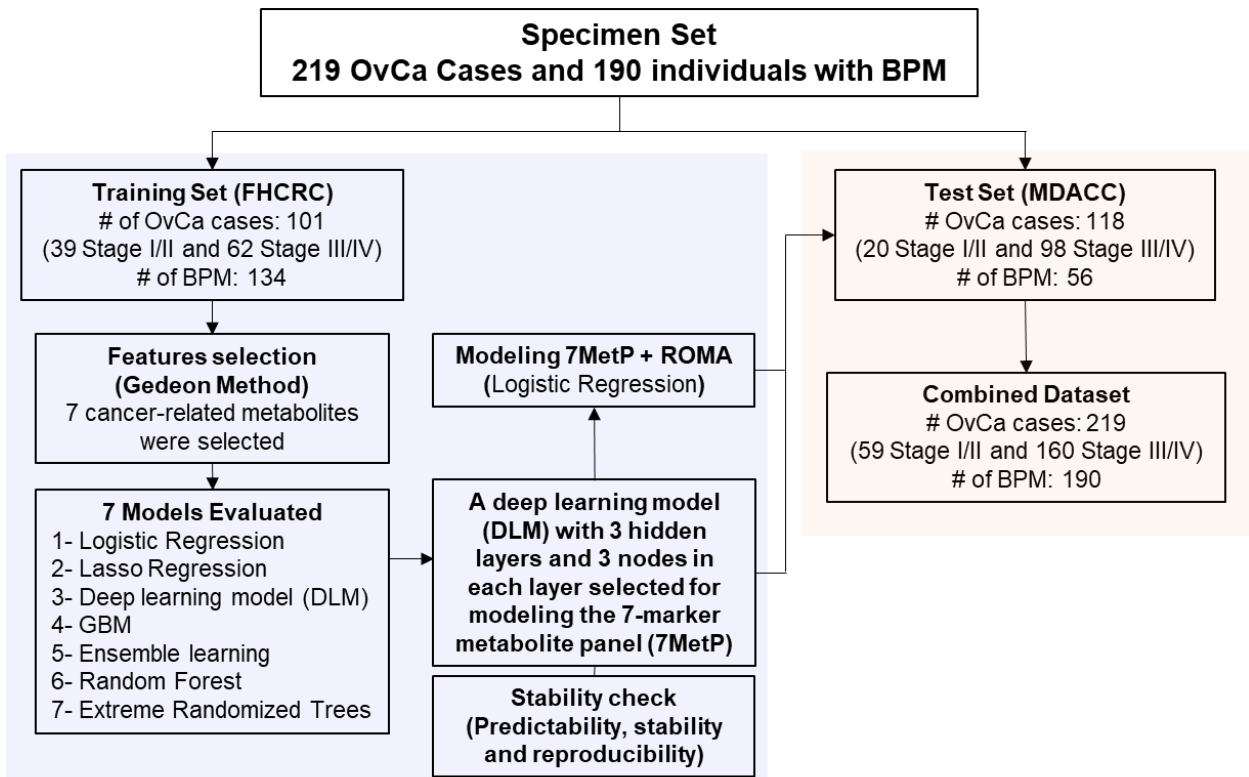

Supplement: NIHMS1834140-supplement-1.pdf [file NIHMS1834140-supplement-1.pdf]
